# Supplementary material
Source: Springer Nature journal article supplement (https://www.springermedizin.de/resource/supplementary/12889_2010_2276_MOESM1_ESM.pdf/9485236)

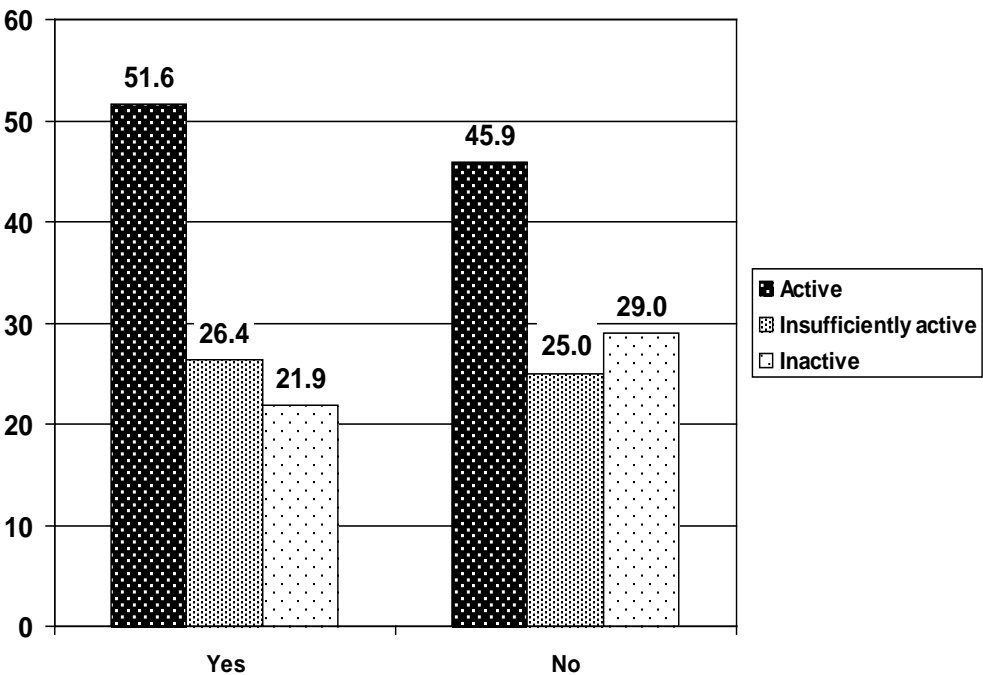

Ever taken a course or class for managing diabetes

Supplement: MOESM1 [file 9485236]
